# Supplementary material for: Effect of Ni2+(S = 1) and Cu2+(S = ½) substitution on the antiferromagnetic ordered phase Co2(OH)PO4with spin glass behaviour
Source: Royal Society of Chemistry journal article supplement (doi:10.1039/b313999a), 2004-01-01
Supplement: b313999a-s1.pdf [file b313999a-s1.pdf]

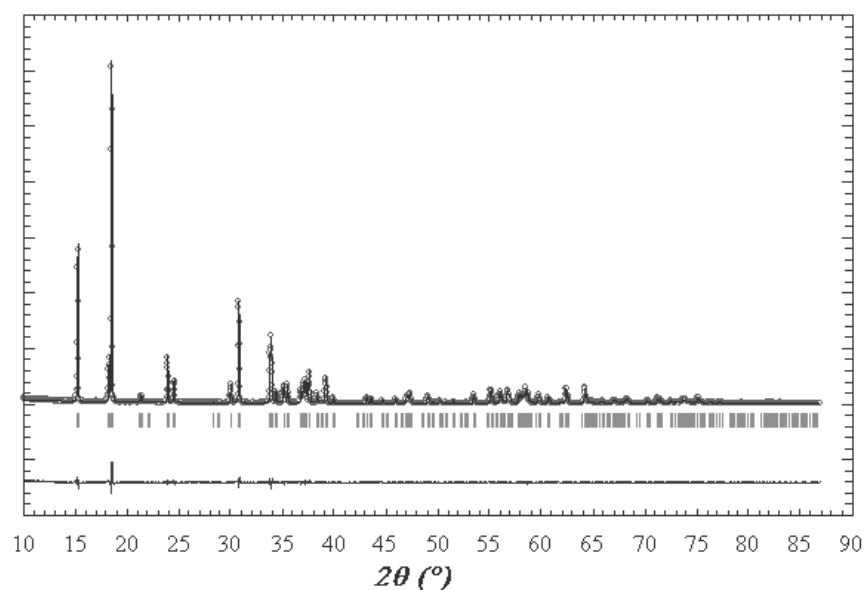

(a)

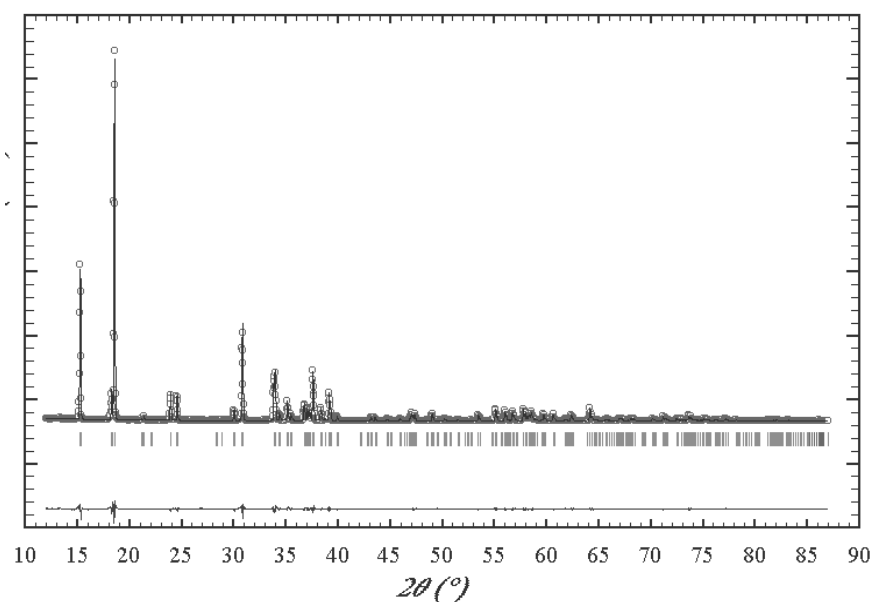

(b)

Fig. S1 Refinement of X-ray powder diffraction profiles at room temperature of  $\text{Co}_{1.7}\text{M}_{0.3}(\text{OH})\text{PO}_4$  (a)  $\text{M} = \text{Ni}$  and (b)  $\text{M} = \text{Cu}$ . Observed (crosses), calculated (solid line) and difference (at the bottom) are included. Vertical marks correspond to the position of the allowed reflections for the crystallographic structure.
