# Supplementary material for: Effect of Ni2+(S = 1) and Cu2+(S = ½) substitution on the antiferromagnetic ordered phase Co2(OH)PO4with spin glass behaviour
Source: Royal Society of Chemistry journal article supplement (doi:10.1039/b313999a), 2004-01-01
Supplement: b313999a-s2.pdf [file b313999a-s2.pdf]

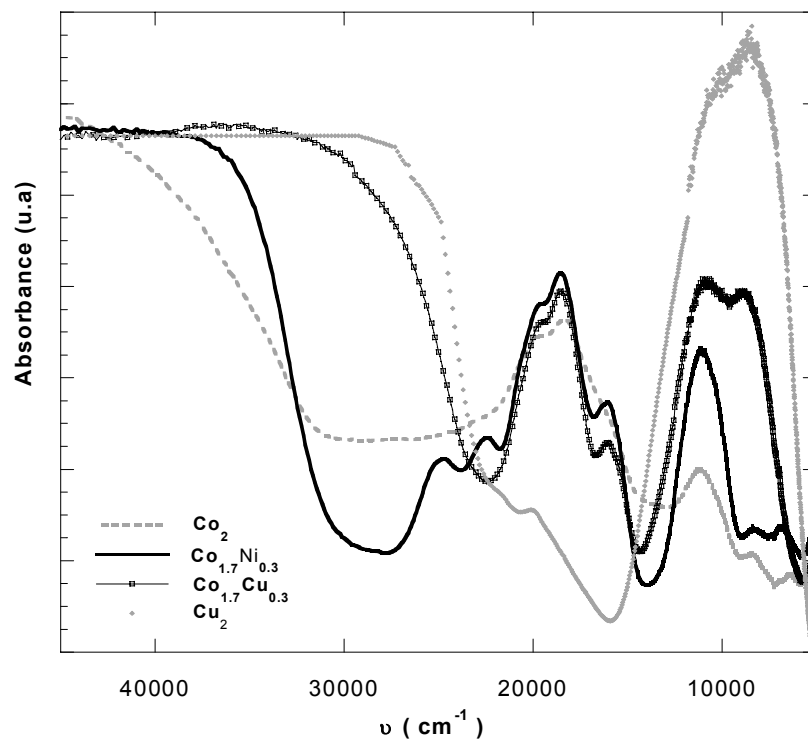

**Fig. S2** Absorbance spectra of  $\text{Co}_{1.7}\text{M}_{0.3}(\text{OH})\text{PO}_4$  ( $\text{M} = \text{Ni}, \text{Cu}$ ) at room temperature. The spectra of  $\text{M}_2(\text{OH})\text{PO}_4$  ( $\text{M} = \text{Co}, \text{Cu}$ ) are also shown for comparison.
